# Supplementary material
Source: publisher figshare collection journal article supplement (https://gsapubs.figshare.com/ndownloader/files/23293817)
Supplement: Supplementary file 1 [file 23293817]

## Sheet: Sheet1
Table DR-2. XRF geochemistry done at Michigan State University
Sample	SiO2 (%)	TiO2 (%)	Al2O3 (%)	Fe2O3 (%)	MnO (%)	MgO (%)	CaO (%)	Na2O (%)	K2O (%)	P2O5 (%)	Totals	LOI (%)	Cr (ppm)	Ni (ppm)	Cu (ppm)	Zn (ppm)	Rb (ppm)	Sr (ppm)	Y (ppm)	Zr (ppm)	Nb (ppm)	Ba (ppm)	La (ppm)
050708-3	79.12	0.16	11.69	0.53	0.04	0.23	0.62	6.15	0.36	0.03	98.93	0.92	bd	bd	25	4	0	185	51	213	Bd	829	Bd
050708-3m	62.18	0.25	17.9	6.44	0.06	3.41	0.75	4.75	0.54	0.04	96.32	3.54	bd	bd	38	41	15	139	67	339	18	571	Bd
050708-3g	77.09	0.17	12.08	1.76	0.04	0.19	0.75	3.9	2.94	0.02	98.94	0.77	bd	bd	36	15	125	181	46	179	Bd	2216	32
050508-3-1	70.79	0.19	15.41	2.21	0.05	1.09	0.68	7.01	0.6	0.02	98.05	1.72	bd	bd	bd	25	12	204	18	115	10	1993	30
050508-3-2	78.1	0.13	10.76	1.95	0.02	0.34	0.3	1.48	6.11	0.01	99.2	0.67	bd	bd	bd	12	220	121	35	116	7	731	29
050508-3-3	70.8	0.11	14.92	3.92	0.04	0.75	0.61	5.97	1.21	0.03	98.36	1.56	bd	bd	bd	21	23	283	24	109	9	280	26
050508-3-4	70.63	0.13	16.41	0.8	0.05	0.74	0.38	9.09	0.27	0.01	98.51	1.42	bd	bd	bd	19	2	194	18	139	7	286	21
050508-3-6	79.37	0.17	11.98	0.64	0.05	0.33	0.47	5.89	0.59	0.03	99.52	0.36	bd	bd	bd	12	12	189	23	148	9	899	37
050508-3-8	75.83	0.19	13.81	0.65	0.03	1.02	0.43	6.3	0.71	0.01	98.98	0.94	bd	bd	bd	18	8	168	21	172	8	352	32
050508-3-9	66.79	0.13	18.69	0.84	0.07	1.21	0.4	9.62	0.54	0.04	98.33	1.58	bd	bd	bd	21	4	187	27	150	9	467	27
050508-3-11	87.92	0.15	7.33	0.46	0.02	0.21	0.21	3.09	0.47	0.02	99.88	0.05	bd	bd	25	5	15	160	15	123	4	304	45
050508-3-15	80.79	0.17	11.07	0.82	0.05	0.37	0.55	5.38	0.36	0.02	99.58	0.32	bd	bd	bd	8	12	188	17	146	6	522	31
050508-3-19	79.93	0.12	10.83	1.59	0.03	0.18	0.58	3.65	2.97	0.01	99.89	0.04	bd	bd	bd	12	115	82	34	92	8	256	32
050508-3m	67.11	0.27	15.81	4.35	0.06	2.46	0.92	4.59	0.73	0.03	96.33	3.55	bd	bd	bd	38	17	194	36	345	12	429	41
050495	74.84	0.23	12.19	2.82	0.03	0.48	0.41	0.71	6.44	0.01	98.16	1.72	bd	bd	bd	21	191	59	46	224	10	514	20
